# Supplementary material for: Network Structure of Depressive Symptomatology in Elderly with Cognitive Impairment
Source: MDPI journal article supplement (doi:10.3390/medicina60050687), 2024-04-23

# **Supplementary Material**

Network Structure of Depressive Symptomatology in Elderly with Cognitive Impairment

## **[2] Supplementary Figures**

**Figure S1.** Bootstrapped difference tests between nodes in the network of GDS-15 symptom items among patients with mild cognitive impairment.

**Figure S2.** Bootstrapped difference tests between nodes in the network of GDS-15 symptom items among patients with Alzheimer's dementia.

**Figure S3.** Bootstrapped difference tests between edge-weights in the network of GDS-15 symptom items among patients with mild cognitive impairment.

**Figure S4.** Bootstrapped difference tests between edge-weights in the network of GDS-15 symptom items among patients with Alzheimer's dementia.

**Figure S5.** Bootstrapped confidence intervals of all edge-weights in the network of GDS-15 symptom items among patients with mild cognitive impairment.

**Figure S6.** Bootstrapped confidence intervals of all edge-weights in the network of GDS-15 symptom items among patients with Alzheimer's dementia.

**Figure S1.** Bootstrapped difference tests between nodes in the network of GDS-15 symptom items among patients with mild cognitive impairment.

*Note:* Gray boxes indicate that nodes are not significantly different from each other, while black boxes indicate that nodes are significantly different ( $\alpha < 0.05$ ) from each other.

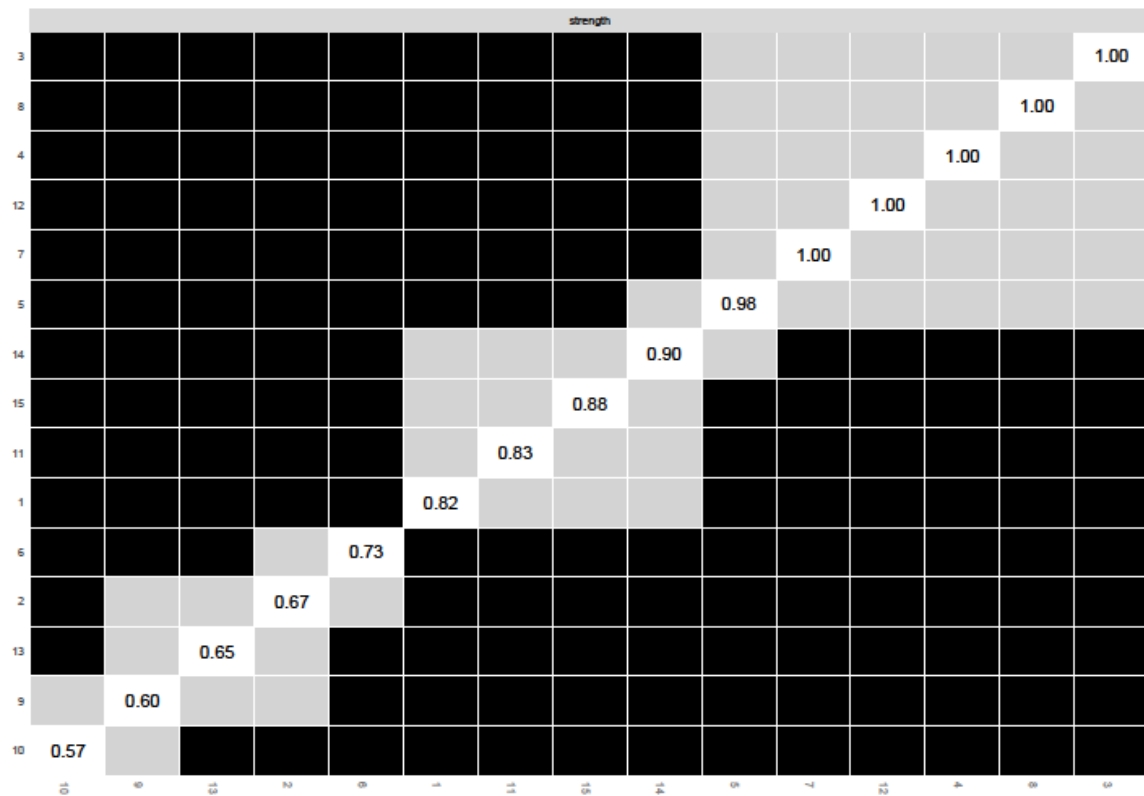

**Figure S2.** Bootstrapped difference tests between nodes in the network of GDS-15 symptom items among patients with Alzheimer's dementia.

*Note:* Gray boxes indicate that nodes are not significantly different from each other, while black boxes indicate that nodes are significantly different ( $\alpha < 0.05$ ) from each other.

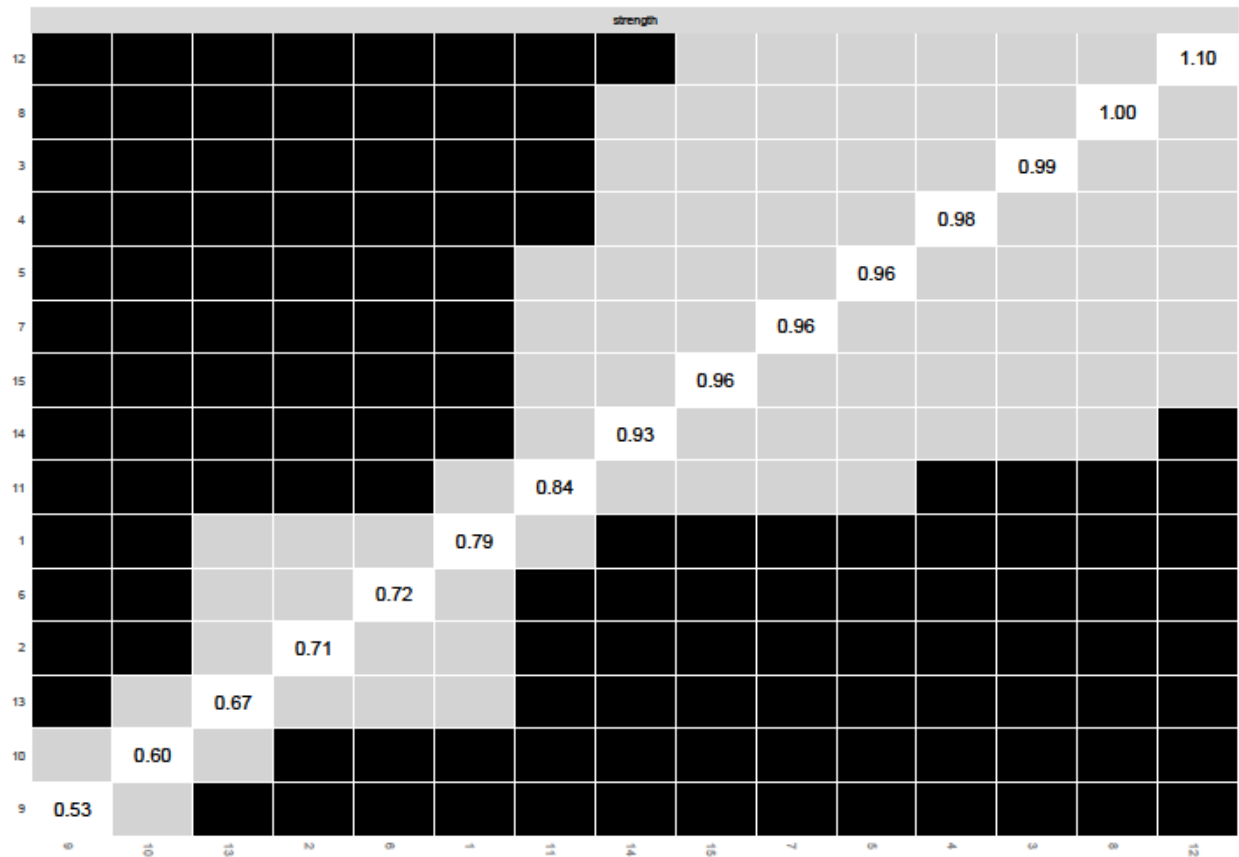

**Figure S3.** Bootstrapped difference tests between edge-weights in the network of GDS-15 symptom items among patients with mild cognitive impairment.

*Note:* Gray boxes indicate that nodes are not significantly different from each other, while black boxes indicate that nodes are significantly different ( $\alpha < 0.05$ ) from each other.

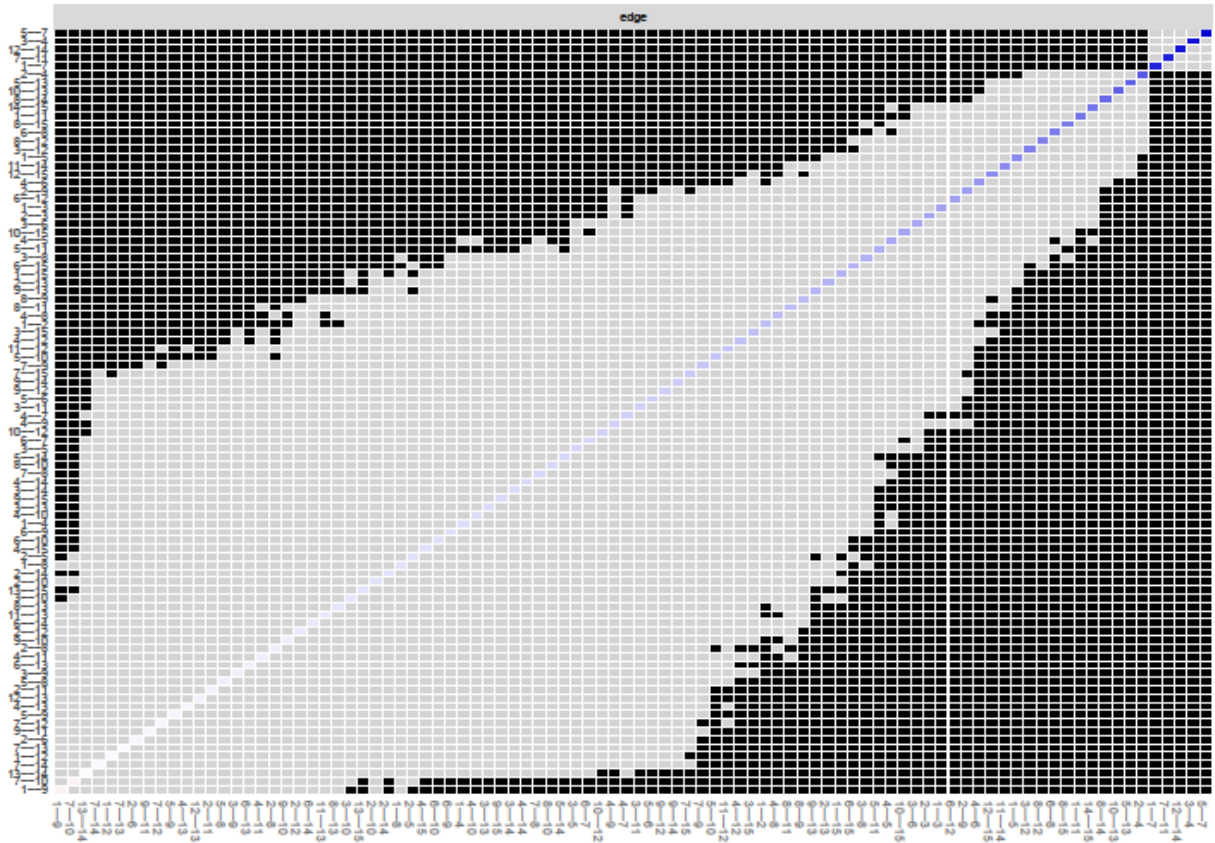

**Figure S4.** Bootstrapped difference tests between edge-weights in the network of GDS-15 symptom items among patients with Alzheimer’s dementia.

*Note:* Gray boxes indicate that nodes are not significantly different from each other, while black boxes indicate that nodes are significantly different ( $\alpha < 0.05$ ) from each other.

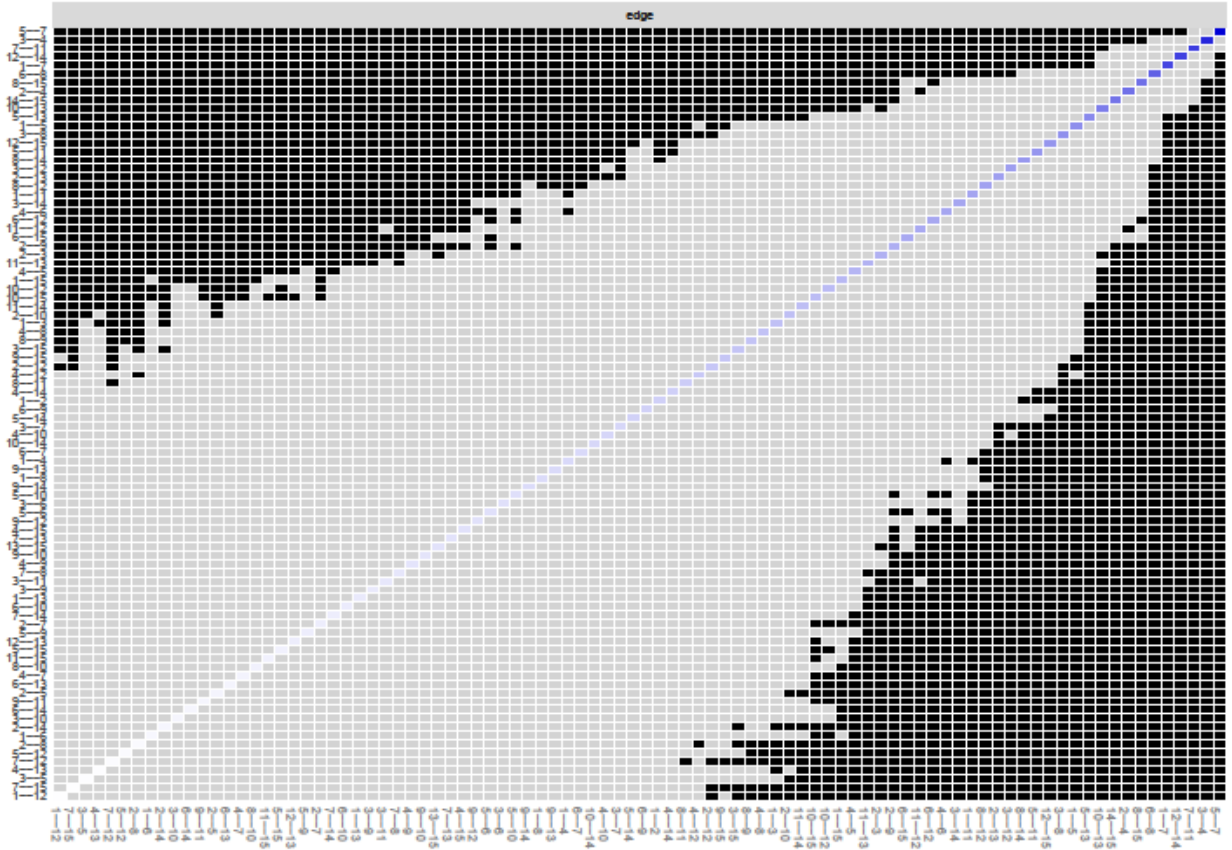

**Figure S5.** Bootstrapped confidence intervals of all edge-weights in the network of GDS-15 symptom items among patients with mild cognitive impairment.

*Note:* The red line indicates edge weights. The gray area indicates 95% confidence interval. Relatively narrow bootstrapped CIs indicate that estimates are precise.

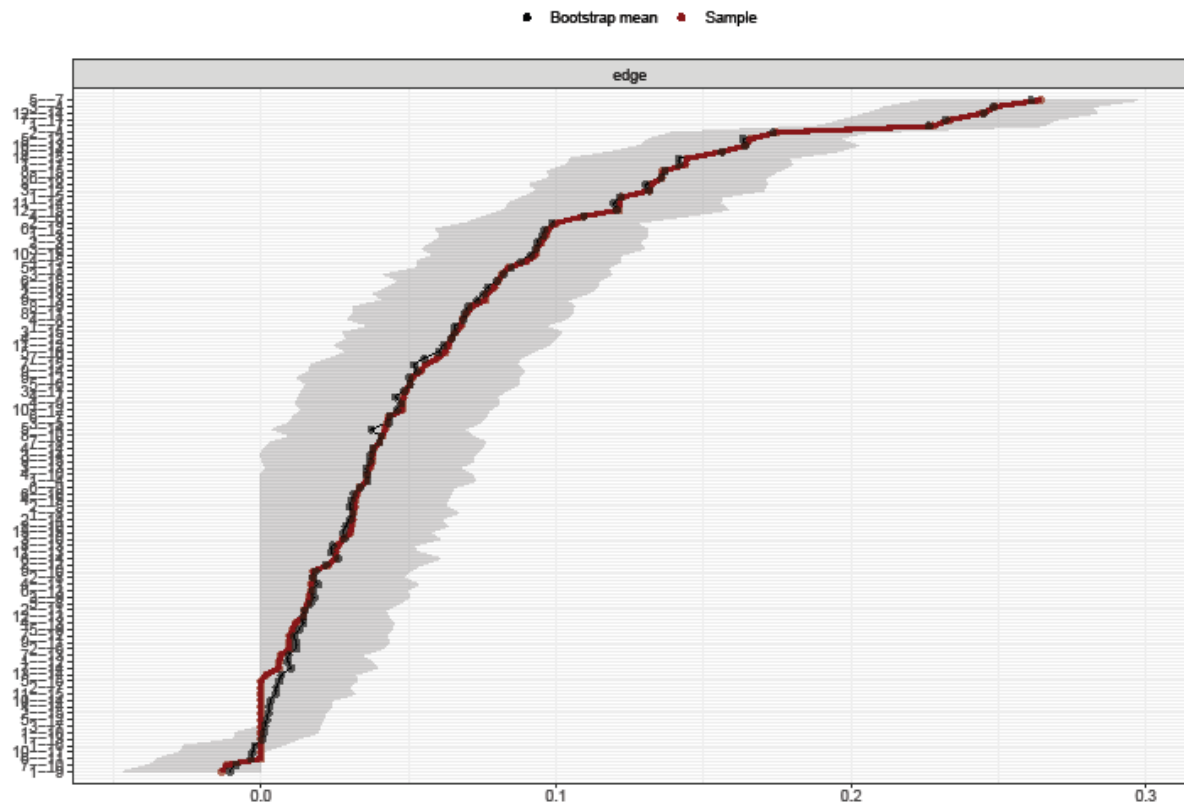

**Figure S6.** Bootstrapped confidence intervals of all edge-weights in the network of GDS-15 symptom items among patients with Alzheimer’s dementia.

*Note:* The red line indicates edge weights. The gray area indicates 95% confidence interval. Relatively narrow bootstrapped CIs indicate that estimates are precise.

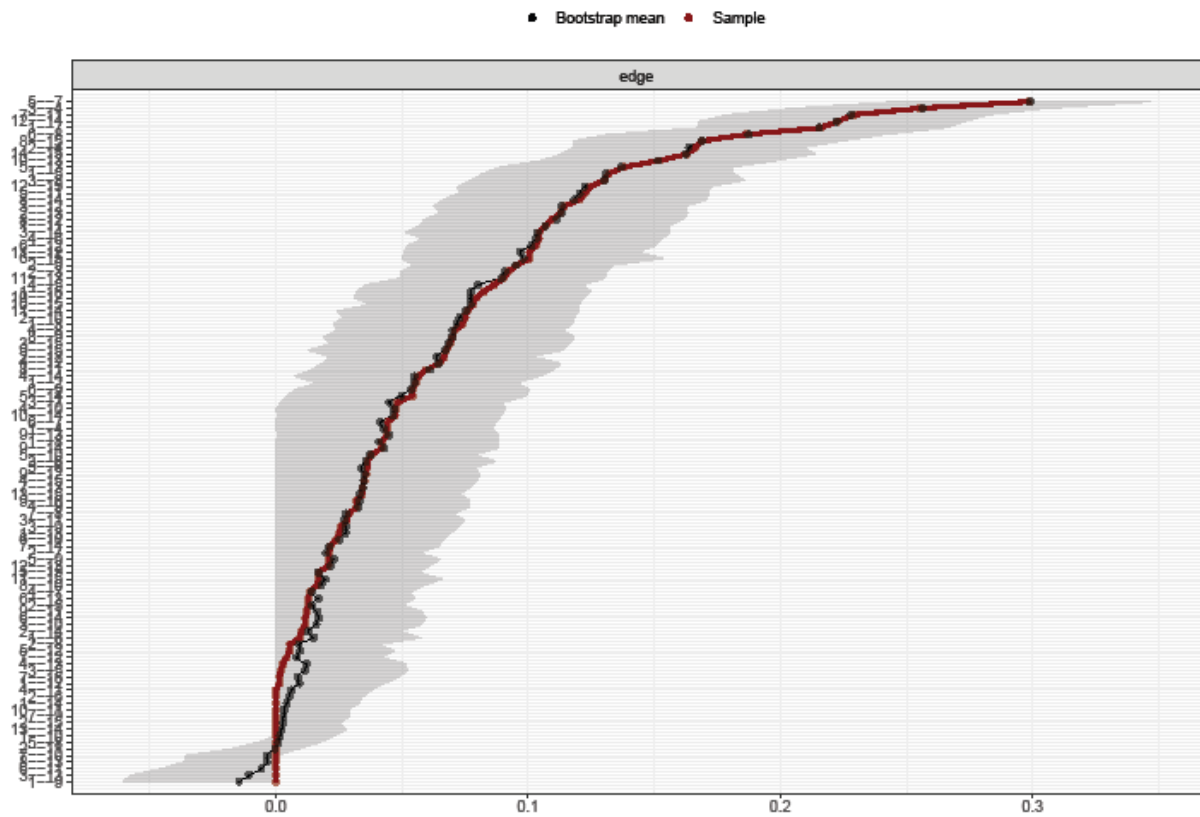

Supplement: s1 [file s1]
